# Supplementary material
Source: publisher site journal article supplement (https://www.dovepress.com/article/560422)
Supplement: Supplementary file 1 [file 560422_Supplementary%20Material.docx]

Supplementary Figure 1.


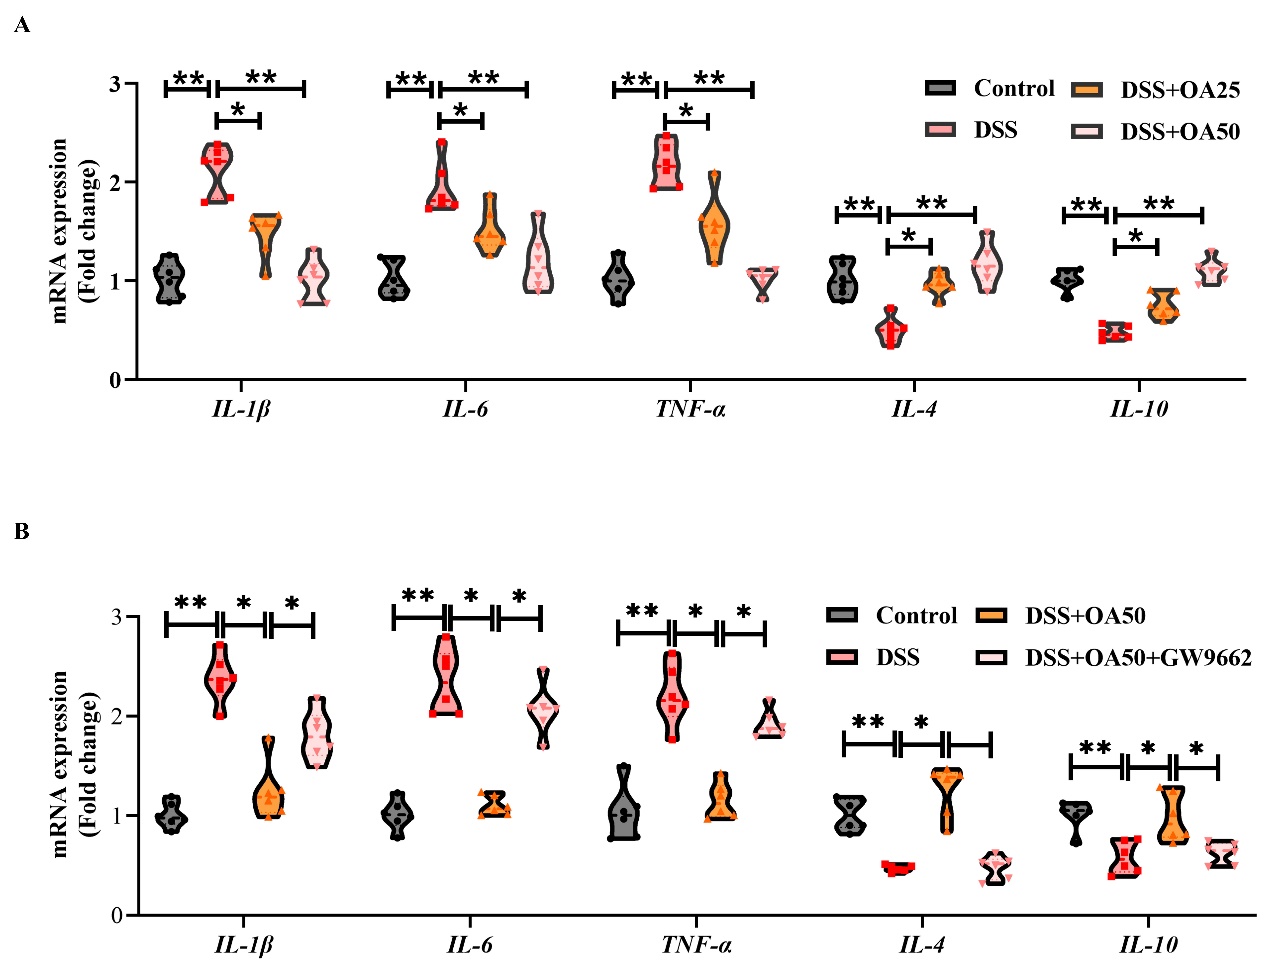


Supplementary Figure 1. (A) The relative mRNA expression levels of IL-1β, IL-6, TNF-α, IL-4 and IL-10 in colonic tissues were determined via qRT-PCR analysis. (B) The relative mRNA expression levels of *IL-1β*, *IL-6*, *TNF-α*, *IL-4* and *IL-10* in colonic tissues were determined via qRT-PCR analysis. All data were presented as mean ± SD, n =6 per group. **P* < 0.05, ***P* < 0.01 vs. corresponding control.

Supplementary Table 1. Primer sequence for quantitative real-time PCR.

| Gene | Forward | Reverse |
| --- | --- | --- |
| *β-actin* | GGCTGTATTCCCCTCCATCG | CCAGTTGGTAACAATGCCATGT |
| *IL-1β* | GAAATGCCACCTTTTGACAGTG | TGGATGCTCTCATCAGGACAG |
| *IL-6* | CTCTGGGAAATCGTGGAAAT | CCAGTTTGGTAGCATCCATC |
| *TNF-α* | CCCTCACACTCAGATCATCTTC | GTTGGTTGTCTTTGAGATCCAT |
| *IL-8* | CAAGGCTGGTCCATGCTCC | TGCTATCACTTCCTTTCTGTTGC |
| *IL-4* | GGTCTCAACCCCCAGCTAGT | GCCGATGATCTCTCTCAAGTGAT |
| *IL-10* | GCTCTTACTGACTGGCATGAG | CGCAGCTCTAGGAGCATGTG |
| *ZO-1* | GCCGCTAAGAGCACAGCAA | TCCCCACTCTGAAAATGAGGA |
| *Occludin* | TTGAAAGTCCACCTCCTTACAGA | CCGGATAAAAAGAGTACGCTGG |
| *Claudin-1* | GGGGACAACATCGTGACCG | AGGAGTCGAAGACTTTGCACT |

Supplementary Table 2. The antibodies list.

| Antibody | Origin | Vendor | Catalog No. |
| --- | --- | --- | --- |
| ZO-1 | Rabbit | HUABIO | HA722797 |
| Occludin | Rabbit | HUABIO | ET1701-76 |
| Claudin | Rabbit | HUABIO | HA721999 |
| iNOS | Rabbit | Proteintech | 22226-1-AP |
| p- P65 | Rabbit | Proteintech | 82335-1-RR |
| P65 | Rabbit | Proteintech | 80979-1-RR |
| PPARγ | Mouse | Proteintech | 66936-1-lg |
| β-actin | Rabbit | ABclonal | AC026 |
| IkBα | Rabbit | Boster | BM3932 |
| IKKα/β | Rabbit | Boster | BM4499 |
| p-IKKα/β | Rabbit | Cell Signaling Technology | 2697S |

Supplementary Table 3. The Secondary antibody list.

| Antibody | Vendor | Catalog No. | Application |
| --- | --- | --- | --- |
| HRP Conjugated AffiniPure Goat Anti-rabbit IgG (H+L) | Boster | BA1054 | WB |
| HRP Conjugated AffiniPure Goat Anti-mouse IgG (H+L) | Boster | BA1050 | WB |
| Goat anti-rabbit IgG H&L (HRP) | Abcam | AB205718 | IHC |
